## 36 Introduction

37 The increased rate of human-driven global change is a major threat to biodiversity [1]. Factors such as climate  
38 change, habitat fragmentation, and environmental degradation are influencing the distribution and abundance of  
39 species, often in ways that are impossible to predict [2]. Thus, a central theme in conservation biology is how  
40 best to manage for species persistence under rapidly changing and often unpredictable conditions. When faced  
41 with environmental change, species may persist by moving (or being moved) to track suitable environments.  
42 Although there is sufficient evidence to suggest that species notably alter their ranges [3], facilitation of such  
43 movement for larger vertebrate species (through the creation of habitat corridors, transfrontier parks or  
44 translocations) often place insurmountable burdens on conservation agencies that are ultimately responsible for  
45 the management of these populations. Notwithstanding, signatory countries to the Convention on Biological  
46 Diversity have an obligation to manage and protect biodiversity, as also set out more recently in the Aichi  
47 Biodiversity Targets .

48

49 Admixture and introgression are major threats to species conservation (these threats are dealt with specifically  
50 under Aichi Target 13; see <https://www.cbd.int/sp/targets/>). The ability to accurately identify introgression is  
51 critical to the management of species [4–9], and may provide unprecedented insights into evolutionary  
52 processes. Although admixture, or even genetic rescue, may have beneficial outcomes through the introduction  
53 of new alleles into small or isolated populations, it can lead to outbreeding depression essentially disrupting  
54 locally adapted gene-complexes [10–13]. Because of the movement of animals (either natural or human-  
55 facilitated), admixture and the effects thereof become increasingly more important to understand and manage.

56

57 Roan antelope (*Hippotragus equinus*) is one of Africa's most iconic large antelope species. It has a sub-Saharan  
58 range, is a water-dependant species, and prefers savanna woodlands and grasslands. [14] recognised six  
59 subspecies namely *H. e. equinus*, *H. e. cottoni*, *H. e. langheldi*, *H. e. bakeri*, *H. e. charicus*, and *H. e. koba* based  
60 on morphological analyses. However, subsequent genetic studies by [15] and [16] provided less support for  
61 these subspecies designation. Although the [15] study included relatively few specimens (only 13 animals were  
62 available at the time), [16] analyzed 137 animals sampled from across the range (the only subspecies not  
63 included in this study was *H. e. bakeri*) for both the mtDNA control region and eight microsatellite markers. Both  
64 the mtDNA control region and microsatellite data provided strong support for a separation between the West  
65 Africa population (corresponding to the *H. e. koba* subspecies) and those from East, Central and Southern Africa  
66 (representing the *H. e. equinus*, *H. e. langheldi*, and *H. e. cottoni* subspecies). Although some differentiation  
67 between East, Central and Southern African roan antelope was evident from the mtDNA data, the different  
68 subspecies did not form monophyletic groups, with no differentiation observed for the microsatellite data. The  
69 placement of the two specimens from Cameroon (corresponding to the *H. e. charicus* subspecies) were unclear,  
70 and the small sample size precluded robust analyses. Based on these results, [16] argued that two evolutionary  
71 significant units should be recognized for roan antelope in Africa, corresponding to a West African lineage and an  
72 East, Central and Southern African lineage.

73

74 Roan antelope is listed as Least Concern, but with decreasing population sizes, notably in East and Southern  
75 Africa [17]. In Southern Africa, roan antelope numbers have dramatically declined in Botswana, Namibia and  
76 Zimbabwe and these animals have been eliminated from large parts of their former range including Angola and  
77 Mozambique [18]. Within South Africa, roan antelope numbers in reserves and protected areas are critically low,  
78 with the majority of animals residing under private ownership on game farms. Indeed, the estimated population  
79 size of wild and naturally occurring roan antelope in protected areas in South Africa is less than 300 animals [19],  
80 yet indications are that roan antelope is thriving on private land. Current estimates suggest that at least 3,500  
81 individuals are managed on private farms [20], with numbers increasing due to these animals being considered  
82 an economically important species by the South African wildlife industry. In the 1990s, a number of roan antelope  
83 (approximately 40) was imported into South Africa under permit from West Africa. Subsequent to their import,  
84 and based on DNA evidence [16], an embargo was placed on the trade of West African animals in South Africa.  
85 Recent anecdotal evidence suggested that animals of West African descent was being traded in (based on  
86 mitochondrial haplotypes; Jansen van Vuuren, pers. comm.), thereby presenting a real and significant threat to  
87 the genetic integrity of roan antelope in South Africa, notwithstanding legislation prohibiting it. Furthermore,  
88 animals are sometimes being exported to other Southern African countries, further endangering regional gene  
89 pools.

90

91 Our aim here is to expand on the limited and non-specific suite of microsatellite markers employed by [16] to  
92 specifically test the validity of these anecdotal reports of trade in West African roan. Also, we assessed the ability  
93 of these markers to discriminate between non-admixed animals and hybrid offspring (F2, F3, and F4). Our results  
94 will not only confirm whether suggestions of hybridization are true, but will also provide a valuable tool to ensure  
95 genetic integrity in the conservation of roan antelope in Southern Africa.

96

## 97 **Materials and Methods**

### 98 *Sampling*

99 Blood, tissue or hair material was obtained from private breeders and game farm owners throughout South Africa  
100 (Table 1). Reference samples were selected from the [16] study and represent animals of confirmed provenance.  
101 A total of 32 West African roan antelope (populations from three farms in Limpopo Province, South Africa), and  
102 98 animals representing the East, Central and Southern African ESU (populations from two farms in the Northern  
103 Cape and North West provinces, South Africa) were included. In addition, eight known hybrids and 15 putative  
104 hybrids were included in this study (Table 1), provided to us by game owners that legally had West African roan  
105 on their farms. Ethical approval was obtained from the Animal Research Ethics Committee, University of the Free  
106 State, South Africa (UFS-AED2017/0010) and the NZG Research Ethics and Scientific Committee  
107 (NZG/RES/P/17/18). Samples were stored in the NZG Biobank and access for research use of the samples was  
108 approved under a Section 20 permit from the Department of Agriculture, Forestry and Fisheries, South Africa  
109 (S20BB1917).

110

111 **Table 1. List of roan antelope (*Hippotragus equinus*) samples.**

| Population / Province                           | Sample size | Classification                |
|-------------------------------------------------|-------------|-------------------------------|
| Western roan population A, Limpopo              | 12          | Reference Western roan        |
| Western roan population B, Limpopo              | 14          | Reference Western roan        |
| Western roan population C, Limpopo              | 6           | Reference Western roan        |
| Rest of Africa roan population A, Northern Cape | 80          | Reference rest of Africa roan |
| Rest of Africa roan population B, North West    | 18          | Reference rest of Africa roan |
| Known hybrids, Limpopo                          | 8           | Known hybrids                 |
| Putative hybrid populations, Limpopo,           | 15          | Putative hybrids              |

112

113 *Microsatellite markers*

114 We selected nine cross-species microsatellite markers (HN60, HN02, HN17, HN27, HN113, HN58, HN09, HN12  
115 and HN13) that were previously characterised in sable antelope (*Hippotragus niger*) by Vaz Pinto [7] and 12  
116 cross-species microsatellite markers (BM3517, BM203, SPS113, BM1818, OARFCB304, CSSM19, ILST87,  
117 BM719, BM757, OARCP26, OARFCB48, INRA006) that were developed for domestic livestock [21–28]. In  
118 addition, species-specific microsatellite markers were developed from non-admixed East, Central and Southern  
119 African roan using a Next Generation Sequencing approach. The Nextera® DNA Sample Preparation Kit  
120 (Illumina, Inc., San Diego, California, USA) was used to create a paired-end library followed by sequencing on  
121 the MiSeq™ sequencer (Illumina, Inc., San Diego, California, USA) using 2 x 300 bp chemistry. Library  
122 construction and sequencing was carried out at the Agricultural Research Council Biotechnology Platform  
123 (Onderstepoort, Gauteng, South Africa). FastQC version 0.11.4 [29] and Trimmomatic version 0.36 [30] were  
124 used for quality control of the raw sequence reads. Tandem Repeat Finder version 4.09 [31] was used to search  
125 the remaining reads for microsatellite motifs and Batchprimer3 software [32] was used to design primer pairs  
126 flanking the repeat regions.

127

128 *Polymerase Chain Reaction (PCR) and genotyping*

129 DNA extractions were performed using the Qiagen DNeasy® Blood and Tissue Kit (Qiagen GmbH, Hilden,  
130 Germany) following the manufacturer's protocols. Polymerase Chain Reaction (PCR) amplification was  
131 conducted in 12.5 µl reaction volumes consisting of AmpliTaq® DNA polymerase (Roche Molecular Systems, Inc)  
132 forward and reverse primers (0.5 µM each), and 50 ng genomic DNA template. The conditions for PCR  
133 amplification were as follows: 5 min at 95°C denaturation, 35 cycles for 30 sec at 95°C, 30 sec at 50-62°C  
134 (primer-specific annealing temperatures) and 30 sec at 72°C, followed by extension at 72°C for 10 min in a  
135 T100™ Thermal Cycler (Bio-Rad Laboratories, Inc. Hercules, CA, USA). PCR products were run against a  
136 Genescan™ 500 LIZ™ internal size standard on an ABI 3130 Genetic Analyzer (Applied Biosystems, Inc., Foster  
137 City, CA, USA). Samples were genotyped using GeneMapper v. 4.0 software (Applied Biosystems, Inc., Foster  
138 City, CA, USA).

139

140 *Genetic diversity*

141 Understanding the diversity within groups provide valuable information to identify hybrid individuals. To this end,  
142 genetic diversity was evaluated for each group separately (the two different ESUs, known hybrids, and putative  
143 hybrids). MICRO-CHECKER [33] was used to detect possible genotyping errors, allele dropout and null alleles.  
144 The mean number of alleles per locus ( $A$ ), allelic richness ( $AR$ ), observed heterozygosity ( $H_o$ ), unbiased  
145 heterozygosity ( $H_z$  = expected heterozygosity adjusted for unequal sample sizes) [34] and number of private  
146 alleles per reference group ( $N_p$ ) was calculated with GenAlEx 6.5 [35,36]. Arlequin 3.5 [37,38] was used to test  
147 for deviations from expected Hardy-Weinberg (HW) proportions of genotypes (Markov Chain length of 105 and  
148 100,000 dememorization steps) and to evaluate loci for gametic disequilibrium (with 100 initial conditions  
149 followed by ten permutations, based on the exact test described by Guo and Thompson [39]. Associated  
150 probability values were corrected for multiple comparisons using Bonferroni adjustment for a significance level of  
151 0.05 [40]. In addition, to determine the discriminatory power of the combined loci, the  $P_{ID}$  was calculated using  
152 GenAlEx [35,36]. Finally, inbreeding ( $F_{IS}$ ) and average pairwise relatedness between individuals within  
153 populations was calculated using the R package Demerelate version 0.9-3 (using 1,000 bootstrap replications)  
154 [41].

155

#### 156 *Population structure and admixture analysis*

157 To estimate the degree of genetic differentiation between populations, we performed an analysis of molecular  
158 variance (AMOVA) and conducted pairwise  $F_{ST}$  comparisons among populations in ARLEQUIN version 3.5  
159 [37,38]. We used two approaches to assess population structure, namely a Bayesian clustering approach  
160 implemented in STRUCTURE version 2.3.4 [42–44] and a Principal Component Analysis (PCA). STRUCTURE  
161 was used for the identification of genetic clusters and individual assignment of non-admixed animals as well as  
162 putative hybrid individuals and was run using a model that assumes admixture, correlated allele frequencies and  
163 without prior population information for five replicates each with  $K = 1 - 6$ , with a run-length of 700,000 Markov  
164 Chain Monte Carlo repetitions, following a burn-in period of 200,000 iterations. The five values for the estimated  
165  $\ln(\text{Pr}(X|K))$  were averaged, from which the posterior probabilities were calculated. The  $K$  with the greatest  
166 increase in posterior probability ( $\Delta K$ ) [45] was identified as the optimum number of sub-populations using  
167 STRUCTURE HARVESTER [46]. The membership coefficient matrices ( $Q$ -matrices) of replicate runs for the  
168 optimum number of sub-populations was combined using CLUMPP version 1.1.2 [47] with the FullSearch  
169 algorithm and  $G'$  pairwise matrix similarity statistics. The results were visualized using DISTRUCT version 1.1  
170 [48]. From the selected  $K$  value, we assessed the average proportion of membership ( $q_i$ ) of the sampled  
171 populations to the inferred clusters. Individuals (parental or admixed classes) were assigned to the inferred  
172 clusters using an initial threshold of  $q_i > 0.9$  [49]. PCA for the complete data set was achieved using the R  
173 package Adegent version 2.1.1 [50].

174

#### 175 *Maximizing the accuracy of assignments*

176 To determine which threshold  $Q$ -value (hybridization or admixture index from clustering algorithms like  
177 STRUCTURE) would maximize the accuracy of assignment, simulated genotypes were created using

178 HYBRIDLAB [51]. Genotypes of non-admixed Western roan antelope, and animals from East, Central and  
 179 Southern Africa (n =30) with  $q_i > 0.90$  (from STRUCTURE-based analysis) were used a parental (P1)  
 180 populations to create the simulated hybrid genotypes (see [9]). A dataset consisting of 180 individuals were  
 181 created consisting of 30 each belonging to non-admixed Western roan antelope, non-admixed Eastern, Central  
 182 and Southern roan antelope, F1 hybrids, F2 hybrids, backcrosses of F1 with Western roan (BC-Western roan)  
 183 and backcrosses of F1 with rest of Africa roan antelope (BC-rest of Africa roan). The simulated dataset was  
 184 analysed with STRUCTURE version 2.3.4 [42–44] using the admixed model, correlated allele frequencies and  
 185 without prior population information for five replicates each with  $K = 1 - 2$ , a run-length of 700,000 Markov Chain  
 186 Monte Carlo repetitions and a burn-in period of 200,000 iterations.

187

## 188 Results

### 189 *Species-specific microsatellite markers*

190 In this study, species specific microsatellite markers were successfully developed using DNA extracted from non-  
 191 admixed roan antelope (i.e., animals of known provenance). Read lengths of 2 x 301 bp (2 x 3,306,938) were  
 192 obtained and after trimming, the remaining reads ranged from 180 to 200 bp (2 x 1,596,026). A total of 14 unique  
 193 loci were identified, of these only six were polymorphic and consistently amplified animals from both ESUs (Table  
 194 2).

195

196 **Table 2. List of six species-specific microsatellite loci developed in *Hippotragus equinus*: F = forward**  
 197 **primer; R = reverse primer; bp = base pairs. GenBank accession numbers are MN699986-MH699992.**

| Marker name | Sequence (5'-3')        | Repeat unit        | Fluorescent dye label | Product size in bp |
|-------------|-------------------------|--------------------|-----------------------|--------------------|
| RAO2118F    | tgccattctgtccttctca     | (TG) <sub>12</sub> | FAM                   | 120                |
| RAO2118R    | aggacatgacttatgactgaaca |                    |                       |                    |
| RAO4116F    | agcaatcctttgcacgaaat    | (AC) <sub>12</sub> | VIC                   | 124                |
| RAO4116R    | atgccagattgggtgacat     |                    |                       |                    |
| RAO7593F    | tgcagccagattcttacca     | (TG) <sub>14</sub> | NED                   | 120                |
| RAO7593R    | caccagaggagcccatatgta   |                    |                       |                    |
| RAO4422F    | cacgagttgttgctgaatg     | (AC) <sub>15</sub> | FAM                   | 118                |
| RAO4422R    | ctcaggctaaccacaatgc     |                    |                       |                    |
| RAO13910F   | gttgagacctggcaatgat     | (AC) <sub>12</sub> | PET                   | 119                |
| RAO13910R   | actaaaggaccgctctgctc    |                    |                       |                    |
| RAO11139F   | cattgagaatcagcgtcctg    | (AC) <sub>14</sub> | NED                   | 115                |
| RAO11139R   | tttccgtacgcctcagaatc    |                    |                       |                    |

198

### 199 *Genetic differentiation and admixture analysis*

200 The final dataset included 27 microsatellite loci that yielded a total of 267 alleles, with the number of alleles  
 201 ranging from 3 to 17 per locus. A total of 27 alleles were unique to the West African roan group, while 27 were

202 found exclusively in the East, Central and Southern African group (Table 3). An analysis of molecular variance  
 203 (AMOVA) unequivocally retrieved the two distinct groups (corresponding to the two ESUs reported by Alpers  
 204 [16];  $F_{ST} = 0.165$ ,  $P < 0.001$ ), validating our two reference groups. Principle component analysis similarly  
 205 revealed a clear separation between the West African versus East, Central and Southern Africa roan (Fig 1A).  
 206 The two distinct genetic clusters ( $K = 2$ ) was supported by the Bayesian assignment analysis (Fig 1B, S1 Fig).  
 207 West African versus East, Central and Southern African roan antelope were assigned to two distinct clusters with  
 208 individual coefficient of membership ( $q_i$ ) for non-admixed Western roan  $q_i > 0.881$  and for non-admixed East,  
 209 Central and Southern Africa roan  $q_i > 0.883$ . With regards to known hybrids, six of the eight known hybrids were  
 210 confirmed as hybrids, with two hybrids being identified as non-admixed Western roan ( $q_i = 0.9664$  and  $q_i =$   
 211  $0.9510$ , respectively). Analysis of putative hybrids identified four out of 15 animals as hybrid (27%).

212

213 **Fig 1. Genetic differentiation analysis between populations based on (A) Principal Component Analysis**  
 214 **(PCA) and (B) STRUCTURE analysis (performed with  $K = 2$ ) of Western roan, rest of Africa roan, known**  
 215 **hybrids and putative hybrids. WRA = Western roan A, WRB = Western roan B, WRC = Western roan C,**  
 216 **SRA = rest of Africa A, rest of Africa B, HYB = known hybrids, PTH = putative hybrids.**

217

218 **Table 3. Private alleles in loci and allele frequency in Western and rest of Africa roan.**

| Population   | Locus    | Allele | Frequency | Population          | Locus     | Allele | Frequency |
|--------------|----------|--------|-----------|---------------------|-----------|--------|-----------|
| Western roan | BM203    | 230    | 0.040     | Rest of Africa roan | BM203     | 240    | 0.005     |
| Western roan | Oarcp26  | 146    | 0.031     | Rest of Africa roan | BM719     | 169    | 0.005     |
| Western roan | Oarcp26  | 148    | 0.047     | Rest of Africa roan | BM719     | 177    | 0.074     |
| Western roan | OARFCB48 | 176    | 0.078     | Rest of Africa roan | Oarcp26   | 118    | 0.010     |
| Western roan | BM1818   | 280    | 0.089     | Rest of Africa roan | Oarcp26   | 124    | 0.015     |
| Western roan | BM757    | 180    | 0.031     | Rest of Africa roan | BM1818    | 256    | 0.058     |
| Western roan | ILST87   | 153    | 0.018     | Rest of Africa roan | BM1818    | 278    | 0.016     |
| Western roan | ILST87   | 159    | 0.018     | Rest of Africa roan | BM1818    | 282    | 0.068     |
| Western roan | RAO4422  | 115    | 0.017     | Rest of Africa roan | BM1818    | 288    | 0.037     |
| Western roan | RAO4422  | 129    | 0.017     | Rest of Africa roan | INRA006   | 117    | 0.077     |
| Western roan | RAO4422  | 137    | 0.050     | Rest of Africa roan | INRA006   | 123    | 0.056     |
| Western roan | RAO4422  | 141    | 0.050     | Rest of Africa roan | INRA006   | 125    | 0.077     |
| Western roan | RAO4422  | 149    | 0.017     | Rest of Africa roan | INRA006   | 127    | 0.337     |
| Western roan | RAO4422  | 151    | 0.033     | Rest of Africa roan | OARFCB304 | 115    | 0.016     |
| Western roan | RAO4422  | 155    | 0.033     | Rest of Africa roan | OARFCB304 | 127    | 0.005     |
| Western roan | RAO4422  | 159    | 0.017     | Rest of Africa roan | ILST87    | 121    | 0.005     |
| Western roan | RAO13910 | 115    | 0.031     | Rest of Africa roan | ILST87    | 127    | 0.005     |
| Western roan | RAO4116  | 126    | 0.047     | Rest of Africa roan | RAO13910  | 141    | 0.040     |
| Western roan | HN02     | 186    | 0.063     | Rest of Africa roan | RAO11139  | 102    | 0.010     |
| Western roan | HN17     | 202    | 0.109     | Rest of Africa roan | RAO11139  | 104    | 0.026     |
| Western roan | HN58     | 124    | 0.031     | Rest of Africa roan | RAO11139  | 108    | 0.072     |
| Western roan | HN58     | 144    | 0.016     | Rest of Africa roan | RAO4116   | 112    | 0.086     |
| Western roan | HN09     | 152    | 0.047     | Rest of Africa roan | HN09      | 168    | 0.005     |
| Western roan | HN09     | 180    | 0.031     | Rest of Africa roan | HN09      | 173    | 0.005     |
| Western roan | HN09     | 194    | 0.031     | Rest of Africa roan | HN12      | 185    | 0.005     |

| Population   | Locus | Allele | Frequency | Population          | Locus | Allele | Frequency |
|--------------|-------|--------|-----------|---------------------|-------|--------|-----------|
| Western roan | HN12  | 171    | 0.032     | Rest of Africa roan | HN12  | 195    | 0.005     |
| Western roan | HN12  | 193    | 0.032     | Rest of Africa roan | HN13  | 184    | 0.025     |

219

220 On South African farms, game owners often employ selective breeding to achieve specific outcomes. For  
221 example, hybrid animals may be backcrossed with pure roan to selectively breed hybrid lineages back to pure; in  
222 theory this can be achieved in  $N = 4$  generations. We wanted to assess whether our markers are able to detect  
223 backcrossed animals, especially in the F3 and F4 generations. In this study, we created a simulated dataset to  
224 maximize the accuracy of assignment to distinguish between the two non-admixed groups (West Africa versus  
225 East, Central and Southern roan antelope), F1 hybrids, F2 hybrids, F1 BC-Western roan and F1 BC-rest of Africa  
226 roan. STRUCTURE analysis of simulated genotypes generated by HYBRIDLAB indicated that all (100%) of the  
227 West African roan versus East, Central and Southern Africa roan, F1 and F2 genotypes were correctly assigned  
228 at thresholds of  $q_i > 0.80$  and  $q_i > 0.85$  (Table 4). At a threshold value of  $q_i > 0.90$ , all F1, F2 hybrid and the East,  
229 Central and Southern Africa roan were correctly assigned, however, 20% of the non-admixed Western roan  
230 would be incorrectly identified as hybrid origin. At a threshold value of  $q_i > 0.95$ , all F1 and F2 hybrid individuals  
231 would be correctly assigned, however, 40% of non-admixed Western roan and 7% of the East, Central and  
232 Southern African roan would be incorrectly identified as hybrid. Our ability to distinguish non-admixed roan from  
233 backcrossed individuals may be problematic in some instances with correct assignment of backcrossed Western  
234 roan individuals varying from 40% at  $q_i > 0.80$  to 97% at  $q_i > 0.95$ , and backcrossed East, Central and Southern  
235 African roan individuals varying from 53% at  $q_i > 0.80$  to 97% at  $q_i > 0.95$ . Based on the simulation results, the  
236 threshold  $q$ -value of  $q_i > 0.85$  was selected for analysis of the non-admixed parental populations, known hybrids  
237 and putative hybrids.

238



239 **Table 4: Percentage of individuals correctly identified at different threshold values.**

| <b>Average</b>                                                      | <b>Western Roan<br/>0.934 &gt; <i>qi</i> &lt;<br/>0.066</b> | <b>Rest of Africa Roan<br/>0.027 &gt; <i>qi</i> &lt; 0.973</b> | <b>F1 hybrid<br/>0.507 &gt; <i>qi</i> &lt; 0.494</b> | <b>F2 Hybrid<br/>0.4601 &gt; <i>qi</i> &lt; 0.539</b> | <b>BC-Western Roan<br/>0.826 &gt; <i>qi</i> &lt; 0.174</b> | <b>BC-Rest of Africa roan<br/>0.203 &gt; <i>qi</i> &lt; 0.797</b> |
|---------------------------------------------------------------------|-------------------------------------------------------------|----------------------------------------------------------------|------------------------------------------------------|-------------------------------------------------------|------------------------------------------------------------|-------------------------------------------------------------------|
| <b>% of Individuals correctly identified at a threshold of 0.20</b> | 100%                                                        | 100%                                                           | 100%                                                 | 100%                                                  | 40%                                                        | 53%                                                               |
| <b>% of Individuals correctly identified at a threshold of 0.15</b> | 100%                                                        | 100%                                                           | 100%                                                 | 100%                                                  | 56.70%                                                     | 83%                                                               |
| <b>% of Individuals correctly identified at a threshold of 0.10</b> | 80%                                                         | 100%                                                           | 100%                                                 | 100%                                                  | 67%                                                        | 93%                                                               |
| <b>% of Individuals correctly identified at a threshold of 0.05</b> | 60%                                                         | 93%                                                            | 100%                                                 | 100%                                                  | 97%                                                        | 97%                                                               |

240

241

242

243

244 *Genetic diversity and relatedness*

245 Deviations from HWE equilibrium were not consistent across populations, with significant deviations from HWE  
246 being observed only in the East, Central and Southern African roan populations. In the East, Central and  
247 Southern Africa roan population A (Northern Cape Province), 11 loci (BM3517, BM719, OARFCB48, CSSM19,  
248 BM1818, BM757, SPS113, INRA006, OARFCB304, RAO4116 and HN27) deviated from HWE. In addition, two  
249 loci (BM3517 and SPS113) deviated from HWE in East, Central and Southern Africa roan population B (North  
250 West Province) following Bonferroni correction. These markers indicated significant heterozygote deficit in the  
251 respective populations with  $H_o$  values lower than  $H_e$  values, which may be an indication of the presence of  
252 possible null alleles. However, null alleles were only observed in six markers (BM3517, BM719, SPS113,  
253 INRA006, RAO4116 and HN27) from the East, Central and Southern African roan group. Significant linkage  
254 disequilibrium (LD) was also observed only in the East, Central and Southern African group. These departures  
255 from equilibrium may be because of substructure in this group (see [16], which described three mitochondrial  
256 DNA groups within this larger ESU), or because of inbreeding. To further investigate the possible causes of  
257 heterozygote deficiency, we estimated the overall inbreeding coefficient per population with positive estimates  
258 only being observed in the East, Central and Southern African roan group ( $F = 0.102$ ). In addition, analysis of the  
259 overall population relatedness was conducted, as mating among close relatives may cause heterozygote  
260 deficiency. As shown in Fig 2, the overall population relatedness was higher in the East, Central and Southern  
261 African roan group (average = 74%) compared to the West African animals (average = 39%).

262

263 **Fig 2. Mean relatedness of rest of Africa roan and Western roan. WRA = Western roan population A, WRB**  
264 **= Western roan population B, WRC = Western roan population C, SRA = Rest of Africa roan population A,**  
265 **rest of Africa population B, HYB = known hybrids, PTH = putative hybrids.**

266

267 Genetic diversity for each population is summarized in Table 5. Overall, the genetic diversity in the Western roan  
268 populations is higher compared to populations from the East, Central and Southern African ESU, notwithstanding  
269 smaller sample sizes. The mean number of alleles ( $A$ ) ranged from 4.15 - 6.07 and 4.26 - 5.70, while allelic  
270 richness ( $AR$ ) ranged from 3.17 - 4.18 and 2.97 - 3.17 in the reference West African group, and East, Central  
271 and Southern African roan groups respectively. Observed heterozygosity ( $H_o$ ) in the Western roan group ranged  
272 from 0.67 - 0.72 and unbiased heterozygosity ( $H_z$ ) from 0.65 - 0.71 while  $H_o$  in the East, Central and Southern  
273 African roan varied from 0.57 - 0.63 and  $H_z$  from 0.605 - 0.609. The  $P_{ID}$  for the 27 loci was  $5.5^{20}$ , thus the  
274 estimated probability of any two individuals by chance alone sharing the same multilocus genotype is  $1.8^{19}$  for  
275 the 27 loci combined.

276 **Table 5. Genetic diversity estimates for roan antelope (*Hippotragus equinus*).**

| Samples                     | No. of samples | Mean no. of alleles per locus (A) | Allelic Richness (AR) | Unbiased Heterozygosity ( $H_z$ ) | Observed Heterozygosity ( $H_o$ ) | Inbreeding coefficient ( $F_{IS}$ ) |
|-----------------------------|----------------|-----------------------------------|-----------------------|-----------------------------------|-----------------------------------|-------------------------------------|
| Western roan population A   | 12             | 4.926                             | 3.418                 | 0.652                             | 0.673                             | -0.018                              |
| Western roan population B   | 14             | 6.074                             | 4.182                 | 0.714                             | 0.709                             | -0.022                              |
| Western roan population C   | 6              | 4.148                             | 3.165                 | 0.667                             | 0.719                             | -0.125                              |
| Rest of Africa population A | 80             | 5.704                             | 2.970                 | 0.605                             | 0.570                             | 0.016                               |
| Rest of Africa population B | 18             | 4.259                             | 2.834                 | 0.609                             | 0.634                             | -0.091                              |
| Known hybrids               | 8              | 4.963                             | 3.425                 | 0.671                             | 0.598                             | ---                                 |
| Putative hybrids            | 15             | 6.296                             | 3.889                 | 0.688                             | 0.692                             | ---                                 |

277

## Discussion

An increasing number of species experience dramatic declining population numbers globally, with ample evidence suggesting that we are entering a mass extinction event. Although the drivers of these population declines are numerous and varied, the underlying root cause inevitably stems from anthropogenic pressures. Not surprisingly, hybridization and admixture of groups with distinct evolutionary trajectories are increasing, raising concerns about the integrity of a large number of species, especially those that experience disproportionately large human interest. For roan antelope, one of Africa's most spectacular large antelope species, this is certainly the case. Although roan antelope numbers are increasing in South Africa (largely because of protection under private ownership), real concerns exist about their genetic integrity given admixture with West African roan antelope, also for export to neighbouring countries. We discuss our results here, and provide some suggestions for roan antelope conservation in South Africa.

### *Evidence of hybridization*

Using a suite of variable and informative microsatellite markers, we provide unequivocal evidence of hybridization and introgression between roan antelope naturally occurring in South Africa (East, Central and Southern African origin), and those of West African descent (a separate evolutionary significant unit; see [16]). More problematic, the identification of first and second generation backcrosses with  $q$ -values close to threshold values strongly suggest that hybrid individuals are viable and fertile; as also suggested from anecdotal evidence from some game farms. Although genetic diversity estimates were moderately higher in the known and putative hybrid individuals, it has previously been reported that F2 hybrids can display reduced fitness as a result of disruption of sets of co-adapted gene complexes by recombination [52,53], thereby weakening the entire gene pool of naturally occurring individuals. Our marker set was able to accurately identify F1 and F2 hybrids, as well as non-admixed individuals at thresholds of  $q = 0.20$  and  $q = 0.15$ . However, the accurate classification of further backcrosses was less accurate at these thresholds (40% to 83%) with backcrossed individuals being incorrectly classified as non-admixed. The use of higher thresholds ( $qi = 0.10$  and  $qi = 0.05$ ) did increase the number of individuals correctly classified as backcrosses, however, this also resulted in an increase in the number of non-admixed individuals being incorrectly classified as hybrids. Thus in certain instances, backcrossed and double backcrossed individuals extend beyond the detection power of the current microsatellite marker panel.

The minimum number of markers required to accurately and consistently identify backcrosses is currently being debated. Simulation analysis in the grey wolf (*Canis lupus*) that hybridizes with domestic dogs (*C. lupus familiaris*) indicated that simply increasing the number of microsatellite markers used does not equate to an increase in the number of correctly identified admixed individuals [54]. It may be important to evaluate single nucleotide polymorphisms (SNPs) with high discriminating power to increase the ability to detect backcrossed and double backcrossed individuals, but in all likelihood thousands of SNPs may be required. Notwithstanding, the marker set described here represents the first step in assessing hybridization in roan antelope, and in the identification of hybrid individuals.

### *Conservation management*

As signatories to the Convention on Biological Diversity, South Africa has an obligation to conserve the genetic integrity of its biological diversity. Furthermore, admixture between distinct wildlife subspecies is prohibited under national and provincial legislation. Within South Africa, wildlife can be privately owned. There has been some debate about the legal rights of an owner to act in a certain manner with its property, and whether farming with wildlife should be managed and regulated any differently than, for example, agricultural stock such as cattle. Notwithstanding, current international, national and provincial legislation is clear in prohibiting admixture, irrespective of ownership.

The private ownership of biological diversity has been advantages for a large number of species, and the high commercial value attached to many of these species has undoubtedly aided in their conservation and protection; to the point where a number of species are doing better under private ownership compared with in protected areas or national parks [55]. Roan antelope is a prime example, but others include sable antelope, white and black rhinoceros, and bontebok to name but a few. Unfortunately, many of these species are intensively managed, with selection for specific desired traits. These management practises have unintended consequences, notably a loss of genetic diversity. In our study, a number of loci showed deviations from HWE and linkage disequilibrium; all which can be ascribed to small numbers of founding individuals and genetic drift on farms [56] which may, in the long term, compromise local adaptation [57]. To fully understand the impact that farming practises, notably intensive management and selection, have on wildlife populations, comparisons need to be done with naturally occurring populations on nature reserves.

Currently, the full extent of hybridization in South Africa between roan antelope belonging to the two distinct ESUs is unknown. Laboratory screening for permitting purposes (to either sell, or translocate animals) suggest that the occurrence of widespread introgression is low, and largely confined to specific game farms.

Animals of West African decent are no longer maladapted to South African conditions and have, over the span of 20 years, adapted to local conditions. The question that needs consideration is whether South Africa should safeguard the genetic integrity and genetic variability of both roan ESUs. If historic occurrence is considered, then all West African animals should be removed from South African populations. However, the South African situation has spawned several *ex situ* breeding programmes and agreements and/or animals that could be allowed to be backcrossed to obtain some form of purity, over four or five generations. This might improve genetic variation within the national population, but may not be desirable given that the impact of hybridization on the South African roan full genome is not known. Thus, we recommend the implementation and continuation of strict genetic monitoring for hybridization in roan antelope in South Africa. With the microsatellite marker set described here, and using a threshold of  $q_i = 0.15$ , it is possible to detect F1 and F2 hybrids prior to translocation, thereby reducing and ultimately eliminating Western roan antelope alleles in the indigenous roan gene pools. In addition, management of roan in South Africa would benefit from a national meta-population

conservation plan to inform translocations and reintroductions and to effectively monitor genetic diversity and further hybridization events.

## **Acknowledgments**

Anna M van Wyk was supported as a doctoral candidate under the Professional Development Programme of the National Research Foundation (NRF) as part of NZG grant no UID93062.

## **Author contribution statement**

AMvW, DLD, AK, JPG & BJvV wrote the main manuscript. AMvW, PSM & ASK conducted the laboratory analysis. AMvW, DLD & BJvV conducted genetic analysis of the data. All authors reviewed the manuscript.

## **Additional information**

### *Conflict of interest*

The authors declare that they have no conflict of interest.

### *Compliance with ethical standards*

Ethical approval was obtained from the Animal Research Ethics Committee, University of the Free State, South Africa (UFS-AED2017/0010) and the NZG Research Ethics and Scientific Committee (NZG/RES/P/17/18). Samples were stored in the NZG Biobank and access for research use of the samples was approved under a Section 20 permit from the Department of Agriculture, Forestry and Fisheries, South Africa (S20BB1917).

### *Data availability*

All species specific primers developed here will be submitted to GenBank following acceptance of this manuscript.

## **References**

1. Ceballos G, Ehrlich PR, Barnosky AD, Garcia A, Pringle RM, Palmer TM. Accelerated modern human-induced species losses: Entering the sixth mass extinction. *Sci Adv.* 2015;1: e1400253–e1400253. doi:10.1126/sciadv.1400253
2. Pimm SL, Jenkins CN, Abell R, Brooks TM, Gittleman JL, Joppa LN, et al. The biodiversity of species and their rates of extinction, distribution, and protection. *Science.* 2014;344: 1246752–1246752. doi:10.1126/science.1246752
3. Chen IC, Hill JK, Ohlemüller R, Roy DB, Thomas CD. Rapid range shifts of species associated with high levels of climate warming. *Science.* 2011;333: 1024–6. doi:10.1126/science.1206432
4. Jansen van Vuuren B, Robinson TJ, Vaz Pinto P, Estes R, Matthee CA. Western Zambian sable: Are they a Geographic Extension of the Giant sable Antelope? *South African J Wildl Res.* 2010;40: 35–42. doi:10.3957/056.040.0114

5. Gompert Z. Population genomics as a new tool for wildlife management. *Mol Ecol.* 2012;21: 1542–1544. doi:10.1111/j.1365-294X.2012.05471.x
6. van Wyk AM, Kotzé A, Randi E, Dalton DL. A hybrid dilemma: a molecular investigation of South African bontebok (*Damaliscus pygargus pygargus*) and blesbok (*Damaliscus pygargus phillipsi*). *Conserv Genet.* 2013;14: 589–599. doi:10.1007/s10592-013-0448-0
7. Vaz Pinto P, Beja P, Ferrand N, Godinho R. Hybridization following population collapse in a critically endangered antelope. *Sci Rep.* 2016;6: 18788. doi:10.1038/srep18788
8. van Wyk AM, Dalton DL, Hoban S, Bruford MW, Russo IRM, Birss C, et al. Quantitative evaluation of hybridization and the impact on biodiversity conservation. *Ecol Evol.* 2017;7: 320–330. doi:10.1002/ece3.2595
9. Grobler P, van Wyk AM, Dalton DL, Jansen van Vuuren B, Kotzé A. Assessing introgressive hybridization between blue wildebeest (*Connochaetes taurinus*) and black wildebeest (*Connochaetes gnou*) from South Africa. *Conserv Genet.* 2018;19: 981–993. doi:10.1007/s10592-018-1071-x
10. Allendorf FW, Leary RF, Spruell P, Wenburg JK. The problems with hybrids: Setting conservation guidelines. *Trends Ecol Evol.* 2001;16: 613–622. doi:10.1016/S0169-5347(01)02290-X
11. Randi E. Detecting hybridization between wild species and their domesticated relatives. *Mol Ecol.* 2008;17: 285–293. doi:10.1111/j.1365-294X.2007.03417.x
12. Banes GL, Galdikas BMF, Vigilant L. Reintroduction of confiscated and displaced mammals risks outbreeding and introgression in natural populations, as evidenced by orang-utans of divergent subspecies. *Sci Rep.* 2016;6: 22026. doi:10.1038/srep22026
13. Ralls K, Ballou JD, Dudash MR, Eldridge MDB, Fenster CB, Lacy RC, et al. Call for a Paradigm Shift in the Genetic Management of Fragmented Populations. *Conserv Lett.* 2018;11: e12412. doi:10.1111/conl.12412
14. Ansell W. Family artiodactyla. In: Meester J, Setzer H, editors. *The Mammals of Africa: an Identification Manual.* Washington, DC, USA.: Smithsonian Institution Press; 1971. pp. 1–84.
15. Matthee CA, Robinson TJ. Cytochrome b phylogeny of the family Bovidae: Resolution within the Alcelaphini, Antilopini, Neotragini, and Tragelaphini. *Mol Phylogenet Evol.* 1999;12: 31–46. doi:10.1006/mpev.1998.0573
16. Alpers DL, Jansen van Vuuren B, Arctander P, Robinson TJ. Population genetics of the roan antelope (*Hippotragus equinus*) with suggestions for conservation. *Mol Ecol.* 2004;13: 1771–1784. doi:10.1111/j.1365-294X.2004.02204.x
17. IUCN SASG. *Hippotragus equinus*. In: *The IUCN Red List of Threatened Species* [Internet]. 2017. Available: <http://dx.doi.org/10.2305/IUCN.UK.2017-2.RLTS.T10167A50188287.en>
18. Havemann CP, Retief TA, Tosh CA, de Bruyn PJJ. Roan antelope *Hippotragus equinus* in Africa: a review of abundance, threats and ecology. *Mamm Rev.* 2016;46: 144–158. doi:10.1111/mam.12061
19. East R. African antelope database 1998 [Internet]. IUCN/SSC Antelope Specialist Group. 1999. Available:

- <http://books.google.com/books?hl=en&lr=&id=59Ci3C8BCmEC&oi=fnd&pg=PR7&dq=African+Antelope+Database+1998&ots=AGpWPs6cAZ&sig=GjowMasjvNknLoC4VlaD4lrmNnY>
20. Bezuidenhout R. High value game farming: how to get started. Farmers Weekly Magazine. 2013.
  21. Vaiman D, Osta R, Mercier D, Grohs C, Levéziel H. Characterization of five new bovine dinucleotide repeats. *Anim Genet.* 1992;23: 537–41.
  22. Buchanan FC, Crawford AM. Ovine microsatellites at the OarFCB11, OarFCB128, OarFCB193, OarFCB266 and OarFCB304 loci. *Anim Genet.* 1993;24: 145.
  23. Bishop MD, Kappes SM, Keele JW, Stone RT, Sunden SLF, Hawkins GA, et al. A genetic linkage map for cattle. *Genetics.* 1994;136: 619–639.
  24. Buchanan FC, Adams LJ, Littlejohn RP, Maddox JF, Crawford AM. Determination of Evolutionary Relationships among Sheep Breeds Using Microsatellites. *Genomics.* 1994;22: 397–403. doi:10.1006/geno.1994.1401
  25. Barendse W, Armitage SM, Kossarek LM, Shalom A., Kirkpatrick BW, Ryan AM, et al. A genetic linkage map of the bovine genome. *Nat Genet.* 1994;6: 227–235. doi:10.1038/ng0394-227
  26. Ede AJ, Pierson CA, Crawford AM. Ovine microsatellites at the OarCP9, OarCP16, OarCP20, OarCP21, OarCP23 and OarCP26 loci. *Anim Genet.* 1995;26: 129–30.
  27. Kemp SJ, Hishida O, Wambugu J, Rink A, Longeri ML, Ma RZ, et al. A panel of polymorphic bovine, ovine and caprine microsatellite markers. *Anim Genet.* 1995;26: 299–306.
  28. Ma RZ, Beever JE, Da Y, Green CA, Russ I, Park C, et al. A male linkage map of the cattle (*Bos taurus*) genome. *J Hered.* 1996;87: 261–71.
  29. Andrews S. FastQC: a quality control tool for high throughput sequence data. Available online at: <http://www.bioinformatics.babraham.ac.uk/projects/fastqc>. 2010.
  30. Bolger AM, Lohse M, Usadel B. Trimmomatic: a flexible trimmer for Illumina sequence data. *Bioinformatics.* 2014;30: 2114–20. doi:10.1093/bioinformatics/btu170
  31. Benson G. Tandem repeats finder: a program to analyze DNA sequences. *Nucleic Acids Res.* 1999;27: 573–580. doi:10.1093/nar/27.2.573
  32. You FM, Huo N, Gu YQ, Luo MC, Ma Y, Hane D, et al. BatchPrimer3: a high throughput web application for PCR and sequencing primer design. *BMC Bioinformatics.* BioMed Central; 2008;9: 253. doi:10.1186/1471-2105-9-253
  33. van Oosterhout C, Hutchinson WF, Wills DPM, Shipley P. MICRO-CHECKER: Software for identifying and correcting genotyping errors in microsatellite data. *Mol Ecol Notes.* 2004;4: 535–538. doi:10.1111/j.1471-8286.2004.00684.x
  34. Nei M. Estimation of average heterozygosity and genetic distance from a small number of individuals. *Genetics.* 1978;89: 583–590.
  35. Peakall R, Smouse PE. GenAEx 6: genetic analysis in Excel. Population genetic software for teaching and research. *Mol Ecol Notes.* 2006;6: 288–295. doi:10.1111/j.1471-8286.2005.01155.x
  36. Peakall R, Smouse PE. GenAEx 6.5: genetic analysis in Excel. Population genetic software for teaching



- and research-an update. *Bioinformatics*. 2012;28: 2537–9. doi:10.1093/bioinformatics/bts460
37. Excoffier L, Laval G, Schneider S. Arlequin (version 3.0): an integrated software package for population genetics data analysis. *Evol Bioinform Online*. 2005;1: 47–50. doi:10.1111/j.1755-0998.2010.02847.x
  38. Excoffier L, Lischer HEL. Arlequin suite ver 3.5: a new series of programs to perform population genetics analyses under Linux and Windows. *Mol Ecol Resour*. 2010;10: 564–567. doi:10.1111/j.1755-0998.2010.02847.x
  39. Guo SW, Thompson EA. Performing the Exact Test of Hardy-Weinberg Proportion for Multiple Alleles. *Biometrics*. 1992;48: 361. doi:10.2307/2532296
  40. Rice WR. Analyzing tables of statistical tests. *Evolution*. 1989;43: 223–225.
  41. Kraemer P, Gerlach G. Demerelate: Functions to calculate relatedness on diploid genetic data. R package version 0.8–0. 2013.
  42. Pritchard JK, Stephens M, Donnelly P. Inference of population structure using multilocus genotype data. *Genetics*. 2000;155: 945–59.
  43. Falush D, Stephens M, Pritchard JK. Inference of population structure using multilocus genotype data: Dominant markers and null alleles. *Mol Ecol Notes*. 2007;7: 574–578. doi:10.1111/j.1471-8286.2007.01758.x
  44. Hubisz MJ, Falush D, Stephens M, Pritchard JK. Inferring weak population structure with the assistance of sample group information. *Mol Ecol Resour*. 2009;9: 1322–32. doi:10.1111/j.1755-0998.2009.02591.x
  45. Evanno G, Regnaut S, Goudet J. Detecting the number of clusters of individuals using the software structure: a simulation study. *Mol Ecol*. 2005;14: 2611–2620. doi:10.1111/j.1365-294X.2005.02553.x
  46. Earl DA, vonHoldt BM. STRUCTURE HARVESTER: a website and program for visualizing STRUCTURE output and implementing the Evanno method. *Conserv Genet Resour*. 2012;4: 359–361. doi:10.1007/s12686-011-9548-7
  47. Jakobsson M, Rosenberg NA. CLUMPP: a cluster matching and permutation program for dealing with label switching and multimodality in analysis of population structure. *Bioinformatics*. 2007;23: 1801–1806. doi:10.1093/bioinformatics/btm233
  48. Rosenberg NA. DISTRUCT : a program for the graphical display of population structure. *Mol Ecol Notes*. 2004;4: 137–138. doi:10.1046/j.1471-8286.2003.00566.x
  49. Barilani M, Sfougaris A, Giannakopoulos A, Mucci N, Tabarroni C, Randi E. Detecting introgressive hybridisation in rock partridge populations (*Alectoris graeca*) in Greece through Bayesian admixture analyses of multilocus genotypes. *Conserv Genet*. 2007;8: 343–354. doi:10.1007/s10592-006-9174-1
  50. Jombart T. adegenet: a R package for the multivariate analysis of genetic markers. *Bioinformatics*. 2008;24: 1403–5. doi:10.1093/bioinformatics/btn129
  51. Nielsen EE, Bach LA, Kotlicki P. HYBRIDLAB (version 1.0): A program for generating simulated hybrids from population samples. *Mol Ecol Notes*. 2006;6: 971–973. doi:10.1111/j.1471-8286.2006.01433.x
  52. Gharrett AJ, Smoker WW. Two Generations of Hybrids between Even- and Odd-Year Pink Salmon (*Oncorhynchus gorbuscha*): A Test for Outbreeding Depression? *Can J Fish Aquat Sci*. 1991;48: 1744–

1749. doi:10.1139/f91-206
53. Johnson NA. Hybrid incompatibility genes: remnants of a genomic battlefield? *Trends Genet.* 2010;26: 317–325. doi:10.1016/j.tig.2010.04.005
54. Randi E, Hulva P, Fabbri E, Galaverni M, Galov A, Kusak J, et al. Multilocus detection of wolf x dog hybridization in Italy, and guidelines for marker selection. *PLoS One.* 2014;9. doi:10.1371/journal.pone.0086409
55. Cousins JA, Sadler JP, Evans J. The challenge of regulating private wildlife ranches for conservation in South Africa. *Ecol Soc.* 2010;15: 28.
56. O’Grady JJ, Brook BW, Reed DH, Ballou JD, Tonkyn DW, Frankham R. Realistic levels of inbreeding depression strongly affect extinction risk in wild populations. *Biol Conserv.* 2006;133: 42–51. doi:10.1016/J.BIOCON.2006.05.016
57. McKay JK, Christian CE, Harrison S, Rice KJ. How Local Is Local-A Review of Practical and Conceptual Issues in the Genetics of Restoration. *Restor Ecol.* 2005;13: 432–440. doi:10.1111/j.1526-100X.2005.00058.x

S1 Fig. a) Probability (-LnPr) of  $K = 1 - 6$  averaged over 5 runs. b) Delta K values for real population structure  $K = 1 - 6$ .

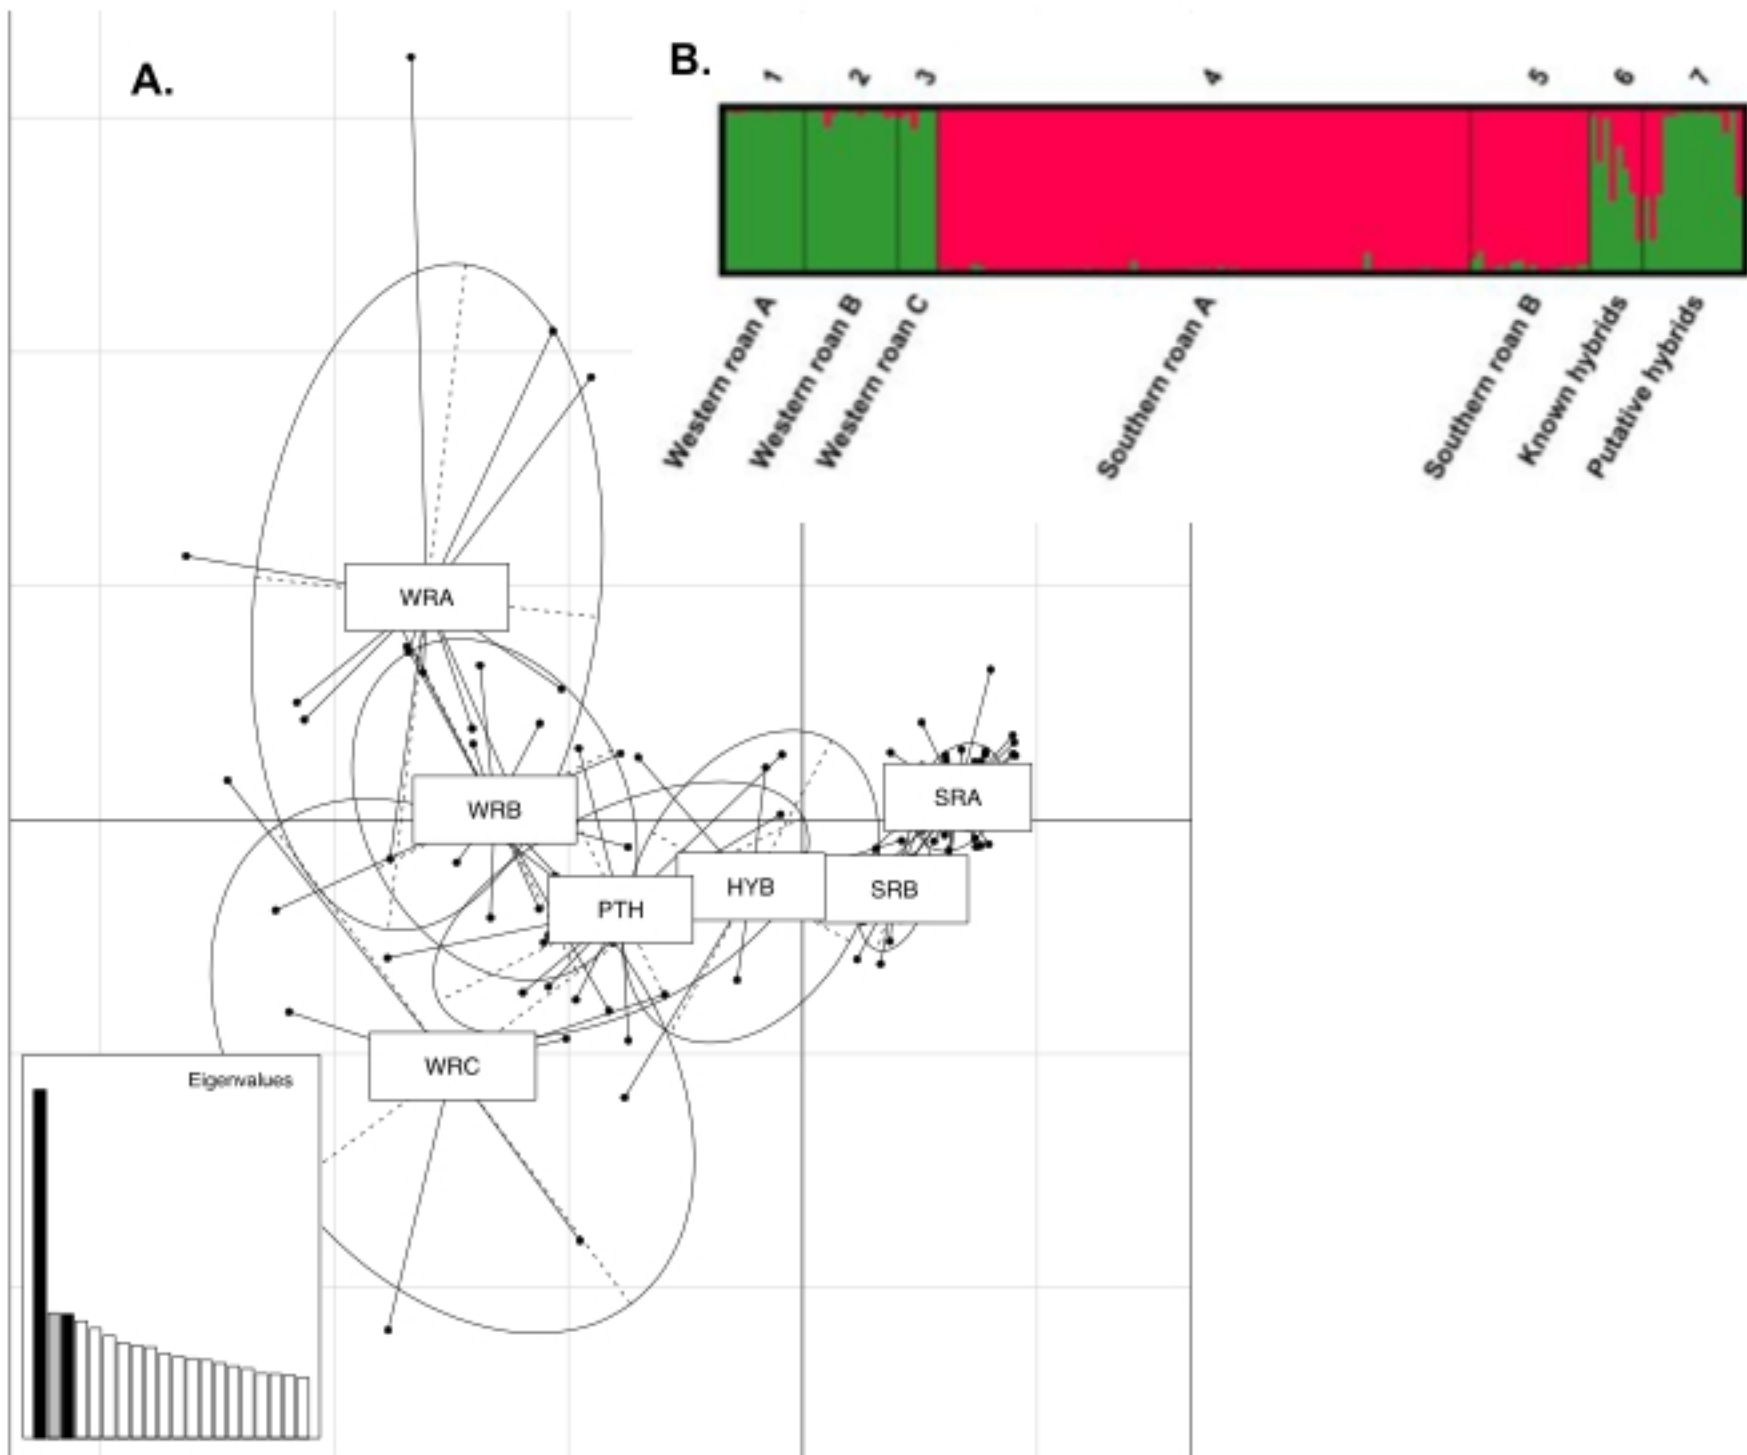

Figure

# Mean relatedness of populations

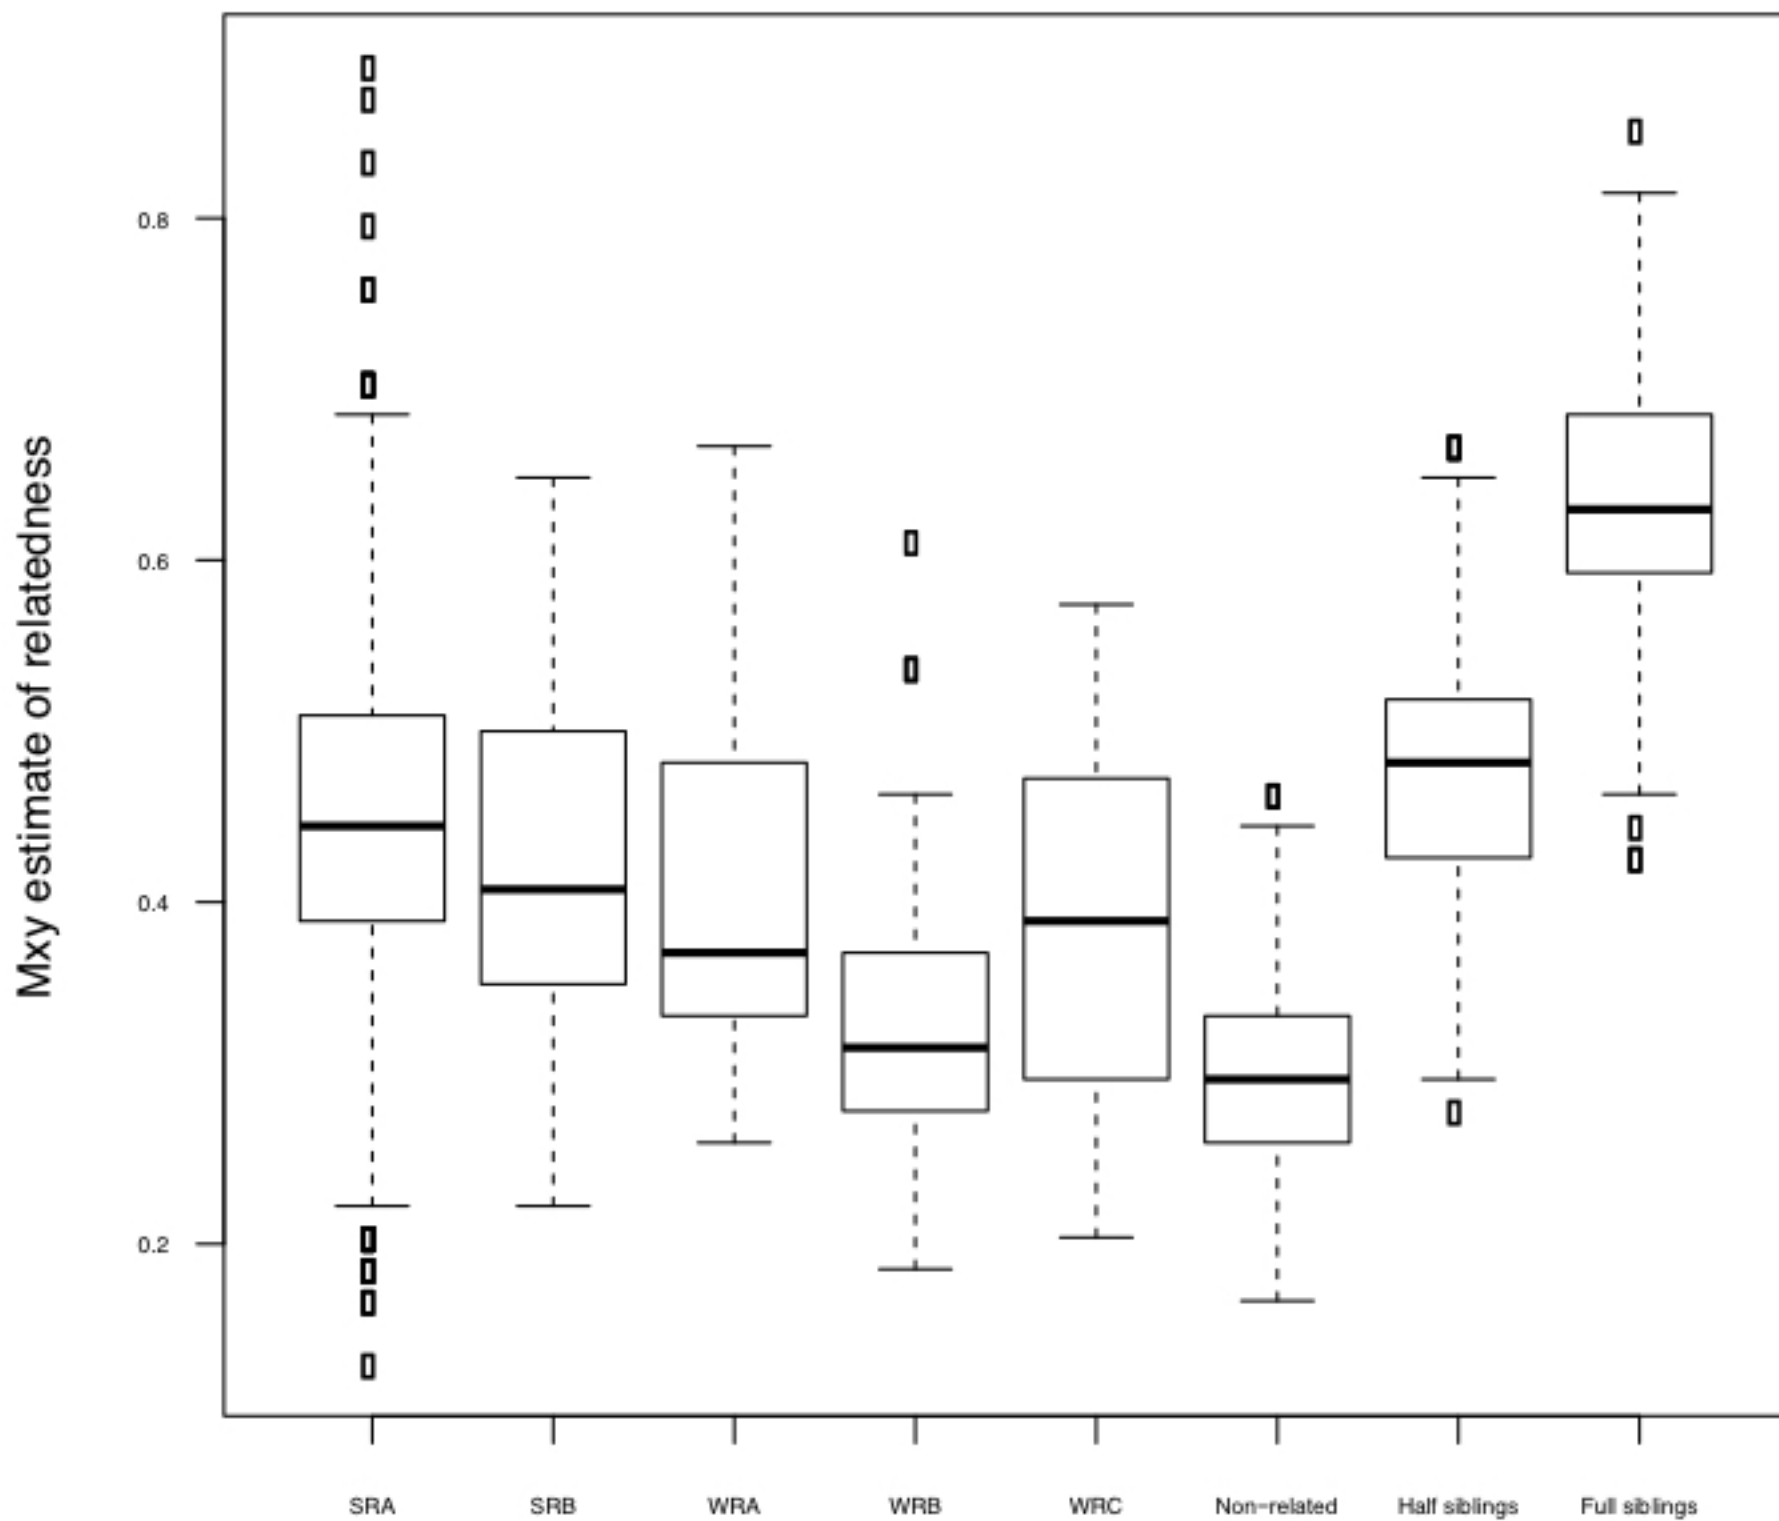

Figure
